# Supplementary material
Source: ML conference proceedings conference paper supplement (https://openreview.net/forum?id=dye9w8IOV0)
Supplement: supplementary_material [file appendix_only.pdf › appendix_only.pdf]

## 837 Appendix

### 838 A Limitations

839 **Robustness of belief extraction.** In this work, in order to maintain a natural conversation, we use  
840 the same LLM with a different prompt to *extract* the belief of each turn as described in § 2.1. Such  
841 believes are later used to measure correctness thus construct the preference pairs for learning, and  
842 they are also used to measure social metrics such as agreement and persuasiveness. While we found  
843 that the majority of such extracted believes are reasonable and consistent with human judgment, the  
844 process is not perfect. This is especially the case with reasoning models (*e.g.*, Gemini-2.5, OpenAI  
845 O1) as they have a strong tendency to output long CoT thus not following our extraction prompt to  
846 directly extract the answer. Besides the method of LLM-as-judge belief extraction, we have also  
847 attempted other methods, such as instructing the LLMs to output in a structured format (*e.g.*, “<CoT>  
848 ... Final Answer: <answer>”), or use the function calls to submit the answer. However, none  
849 of these methods works as well as the LLM-as-judge extraction method we eventually used for this  
850 work, especially as the instruction following ability drastically drops when the context starts to get  
851 lengthy due to the conversational format.

852 **Measuring agreement for generation tasks.** The reasoning tasks in this work typically have an  
853 answer of only a handful of tokens by length, *i.e.*, “(A)” or “ $\frac{2}{5}$ ”, which makes it easier to  
854 measure agreement since we can simply perform a (normalized) string match. However, measuring  
855 agreement is challenging for reasoning tasks with answers that are grammatically rich and complex,  
856 such as code. For code generation tasks, for example, measuring agreement would require going  
857 beyond the textual form and comparing the semantics of two code snippets, which is a known hard  
858 problem. For this reason, to measure the collaborative reasoning abilities on coding tasks, we opt to  
859 deduce the problem into a code correctness classification problem to avoid such issue. For future  
860 work, it would be interesting to again resort to LLM-as-judge method to measure the agreement  
861 between the believes of the two agents.

862 **Binary learning signal at turn-level.** The way to determine “good” and “bad” conversation turns  
863 in this work is by checking whether that specific turn contains belief that matches the gold answer.  
864 While the empirical results show this simple method to be quite effective, it also mimics the outcome  
865 supervision thus not giving any procedural supervision for correct reasoning and social behaviors. As  
866 a binary learning signal, the turns that are making meaningful progress towards the final answer but  
867 not necessarily has the correct final answer yet would be given the same score (*i.e.*, zero) with the  
868 turns that are on completely wrong path. This would not help the models to learn to truly decompose  
869 the problem into individual steps for collaboration, but instead encourage the models to collaborate in  
870 more of a “versioning” approach, where at the end of each turn, an answer will need to be given. For  
871 future work, we would like to explore methods with monte-carlo roll-outs to estimate the progress for  
872 the turns that do not have the final answer yet.

### 873 B Social Metrics

874 Apart from the conversation-level metrics defined in § 2.1, we introduce custom metrics to evaluate  
875 turn-level responses of agents in conversations. We design these metrics to be straightforward and  
876 computationally efficient, to enable their application in large-scale conversational analysis.

877 **Persuasiveness** in communication refers to the ability of a speaker to influence the attitudes, beliefs,  
878 or behaviors of listeners. For our analysis, we define persuasiveness at the turn level as the extent to  
879 which an agent’s utterance leads to a measurable change in the other agent’s subsequent responses.

880 **Assertiveness** is characterized by the confident and direct expression of one’s thoughts, feelings,  
881 and needs while respecting the rights and perspectives of others [25, 42]. In our work, assertiveness  
882 at the turn level is defined as the extent to which an agent maintains its beliefs or responses when  
883 challenged by its partner. This metric evaluates the agent’s ability to resist persuasion and uphold its  
884 original stance during interactions.

885 We leverage the belief of agents computed using the ground truth answers (as defined in § 2.1) to  
886 compute these metrics. Formally, given the  $i^{th}$  turn utterance for the agent  $u$ , the persuasiveness

|                         | MATH        |                  |                  | MMLU-Pro    |                  |                  | GPQA        |                  |                  | ExploreToM  |                  |                  |
|-------------------------|-------------|------------------|------------------|-------------|------------------|------------------|-------------|------------------|------------------|-------------|------------------|------------------|
|                         | $\alpha(C)$ | $\mathcal{P}(u)$ | $\mathcal{A}(u)$ |
| GPT-4o                  | 97.1        | 46.7             | 0.4              | 95.8        | 46.5             | 0.7              | 91.7        | 43.3             | 0.7              | 99.0        | 46.3             | 1.0              |
| O1                      | 93.4        | 45.7             | 1.7              | 98.8        | 48.8             | 0.2              | 98.9        | 37.6             | 4.0              | 99.3        | 48.0             | 0.9              |
| Gemini-1.5-Pro          | 98.5        | 47.1             | 1.0              | 96.4        | 26.9             | 5.5              | 95.8        | 46.6             | 8.9              | 97.2        | 45.3             | 1.3              |
| Llama-3.1-8B-Instruct   | 89.9        | 38.7             | 2.4              | 93.2        | 40.2             | 2.0              | 89.7        | 36.2             | 2.9              | 74.3        | 30.0             | 5.4              |
| Llama-3.1-70B-Instruct  | 92.2        | 42.2             | 1.3              | 97.0        | 45.6             | 0.7              | 84.8        | 38.1             | 2.1              | 99.2        | 48.3             | 0.4              |
| Llama-3.1-405B-Instruct | 97.8        | 47.2             | 0.2              | 98.7        | 48.5             | 0.2              | 98.2        | 17.7             | 3.1              | 99.6        | 48.5             | 0.7              |

Table 5: **Social metrics.** We evaluate agreement  $\alpha$  between the agents over the conversation  $C$  in addition to persuasiveness  $\mathcal{P}$  and assertiveness  $\mathcal{A}$  at turn-level.

$\mathcal{P}(u_i)$  and assertiveness  $\mathcal{A}(u_i)$  of  $u$  are defined as follows:

$$\mathcal{P}(u_i) = \mathbb{I}(\beta_i^u = \beta_i^{u'} \wedge \beta_{i-1}^{u'} \neq \beta_i^{u'}) \quad (1)$$

$$\mathcal{A}(u_i) = \mathbb{I}(\beta_i^u = \beta_{i-1}^u \wedge \beta_{i-1}^{u'} \neq \beta_{i-1}^u) \quad (2)$$

where  $u'$  represents the partner agent and  $\beta$  represents an agent’s belief of the answer as defined in § 2.1. To the best of our knowledge, our evaluation paradigm and metrics are first-of-their-kind, paving way for evaluating and developing truly collaborative AI agents. Tab. 5 provides these metrics for the self-collaboration experiments reported in Tab. 1. Overall, we find that models lack assertiveness and persuasiveness for effective collaboration.

## C Details on Matrix

**Matrix**, short for “Multi-agent data generation infra and experimentation framework”, is a scalable, robust and versatile model serving framework drastically improving multi-agent conversational data generation.

More specifically, it is designed to handle these infra challenges:

- *Challenges in generating conversational data:* unlike single-turn synthetic data generation workloads, which can benefit from batched inference, for conversational data generation, typically multiple different models need to be served at the same time with interleaved generation, which results in idle time or constant model loading and offloading with batched inference;
- *Scalability challenges:* running multiple models, each with multiple replicas that can spread across the cluster poses challenges in efficient network communication and resource management. The new framework should be able to scale to thousands of conversations being generated simultaneously on hundreds of nodes with the throughput of millions of multi-turn data continuously synthesized each day.

**Key features of Matrix.** Matrix is a high-performance model serving engine designed for large scale inference. It integrates Slurm for resource management and Ray for distributed job execution. It leverages lower-level model serving engines such as vLLM, SGLang for efficient LLM inference, and support API-based services such as OpenAI (through Azure). Here are some of the key features that makes Matrix efficient and easy to use:

- Deploy model replicas to hundreds of GPUs and serve thousands of requests in parallel;
- Fully pythonic, no more sbatch scripts to start the service;
- Modular design to easily plug into existing workflows;
- Support deploying multiple models at the same time;
- Easy to share deployed model endpoints with others;
- Auto scale serving replicas;

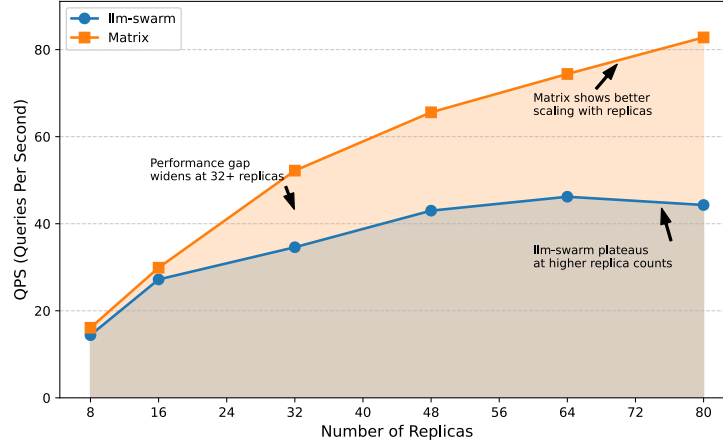

Figure 6: **QPS of Matrix vs. llm-swarm.** We compare QPS using 5K MATH evaluation with different number of replicas of Llama-3.1-8B-Instruct.

| Serving Frameworks            | Slurm | vLLM | HTTP | gRPC | Auto-scaling | Open-source |
|-------------------------------|-------|------|------|------|--------------|-------------|
| vector-inference <sup>7</sup> | ✓     | ✓    | ✓    | ✗    | ✗            | ✓           |
| litellm <sup>8</sup>          | ✗     | ✓    | ✓    | ✗    | ✗            | ✓           |
| ollama <sup>9</sup>           | ✗     | ✗    | ✓    | ✗    | ✗            | ✓           |
| SageMaker <sup>10</sup>       | ✗     | ✓    | ✓    | ✗    | ✓            | ✗           |
| llm-swarm <sup>11</sup>       | ✓     | ✓    | ✓    | ✗    | ✗            | ✓           |
| Matrix (ours) <sup>12</sup>   | ✓     | ✓    | ✓    | ✓    | ✓            | ✓           |

Table 6: **Matrix vs. existing frameworks.** Feature comparison between Matrix and other open-source or closed source model serving frameworks highlights the versatility of Matrix.

**Comparison with existing frameworks.** Tab. 6 shows a comparison of Matrix with existing frameworks for the key features that allows large-scaling generation of multi-agent, conversational data in a typical research environment. Among these frameworks, the llm-swarm developed by huggingface is probably the most similar option, albeit lacking features as gRPC and Auto-scaling. Moreover, when compared with Matrix on the wall-time to finish a fixed workload on conversation generation, we found Matrix to be up to 1.87x faster than llm-swarm, especially when we scale up the resources given to these two frameworks. Note that this is achieved when using the same backend, and we hypothesize that the gRPC support for Matrix greatly helped reducing network congestion thus achieving higher efficiency.

With all the features and efficiency gains provided by Matrix, we are able to drastically scale up the synthesis of collaborative conversations for the self-training method in § 4.1.

## D Experiment Details

### D.1 Task Setups

We consider 5 tasks for Coral, spanning math problems, STEM question answering, graduate-level science reasoning, and theory-of-mind reasoning. As described in § 2.1, two agents aim to solve problems from these tasks over a multi-turn conversation in Coral.

<sup>7</sup><https://github.com/VectorInstitute/vector-inference>

<sup>8</sup><https://github.com/BerriAI/litellm>

<sup>9</sup><https://github.com/ollama/ollama>

<sup>10</sup><https://aws.amazon.com/sagemaker>

<sup>11</sup><https://github.com/huggingface/llm-swarm>

<sup>12</sup><https://github.com/facebookresearch/matrix>

- **MATH** [15] consists of 12.5K challenging competition-level mathematics problems and exact match is used to measure the correctness. We train with the 7.5k training examples and evaluation on the first 1k test examples;
- **MMLU-Pro** [45] contains approximately 12k questions from 14 STEM disciplines. MMLU-Pro uses multiple choice question answering format, where an answer must be chosen from 10 options. Since there is not a dedicated split for training, we re-split the original 12K test data into 10.8K examples for training and 1.2K examples for testing;
- **GPQA** [33] is a graduate-level multiple choice question answering benchmark containing 448 questions across physics, chemistry, and biology. While MMLU-Pro offers the challenge of reasoning across a breadth of diverse topics, GPQA focuses on depth and advanced reasoning in graduate-level science subjects, thus we use GPQA as an evaluation-only dataset to test out-of-domain generalization capabilities of collaborative reasoners;
- **ExploreToM** [35] is a theory-of-mind reasoning benchmark containing complex stories involving multiple characters. The task involves answering theory of mind reasoning questions focused on tracking character beliefs and actions based on the given story. And we split the dataset<sup>13</sup> 10.4K/1.5K/1.5K train/val/test sets.
- **Hi-ToM** [14] is a benchmark consisting of 600 examples that evaluates higher-order theory-of-mind reasoning capabilities, where the models need to recursively reason about the beliefs of the characters in a story. We also use Hi-ToM as a eval-only dataset for models that are trained with ExploreToM data. To elicit a more challenging setting, we ignore the multiple choices in Hi-ToM and ask the model to produce an answer and use exact match for evaluation.
- **MBPP-CR** is a code reasoning benchmark adapted from [3], which originally consists of 974 entry-level programming tasks. To facilitate collaborative settings for solving programming tasks, we transform the code generation task into a binary choice task on code correctness. Specifically, we use ‘Llama-3.1-405B-Instruct’ to sample code solutions for each task and execute the generated code to get a true or false answer as to whether it passes the assertions provided in the MBPP dataset. For the train split, we generate 10 solution samples per task, and 2 samples per task for the test split, resulting in 4k training and 1k test examples for MBPP-CR.

For different tasks, we (lightly) engineered some task-specific prompts, which are shown in Tab. 8.

## D.2 Hyperparameters.

For both evaluation and synthetic conversation generation, we limit the conversation to be at most 20 turns (*i.e.*, 10 rounds), and end the conversation early when agreement is reached. During tree sampling, we set the turn-level beam size  $d = 5$  and independently sample 5 trees for each problem, and we set sample size = 25 for SFT methods to ensure fair comparison. Subsequently during filtering, we limit at most 2 pairs of preference pairs generated from the same level (*i.e.*, turn) and at most 20 preference pairs generated across all trees for the same problem, in order to balance the amount of examples from different problems as discussed in § 4.1. For both SFT and DPO, we use the fairseq2 [4] and TRL<sup>14</sup> to fully-parameterized train the models for 1,000 ~ 3,000 steps with batch size of 20 ~ 50. We limit the sequence length (input + output) to be 8,192, which is able to accommodate > 90% of the sequences in the turn-based training data. For DPO, we start training from the instruction-tuned version of Llama-3.1/Qwen-2.5/Ministral series and use the same model for the reference model. More detailed hyperparameters can be found in the accompanying code base. All experiments are conducted on AWS p5.48xlarge instances, each with 8x H100 80GiB GPUs.

## D.3 Human Annotation Details

The annotations are conducted on 100 examples on the MMLU-Pro dataset for the Llama-3.1-70B-Instruct model before and after it is trained with synthetic data generated via self-play. To remove the bias of correctness and only focus on the conversation quality and social

<sup>13</sup><https://huggingface.co/datasets/facebook/ExploreToM>

<sup>14</sup><https://huggingface.co/docs/trl/en/index>

| Conversation A                                                                                                                                                                                                                                                                                                                                                                                                                                                                                                                                                                                                                                                                                                                                                                                                                                                                                                                                                            | Conversation B                                                                                                                                                                                                                                                                                                                                                                                                                                                                                                                                                                                                                                                                                                                                                                                                                                                                                                                                                                                  | Conversation A Questions (PLEASE STUDY THE EXAMPLES IN THE GUIDELINES FOR MORE INFO)                                                                                                                                                                                                                                                                                                                                                                                                                                                                                                                                                                                                                                                                                                                                                                                                                                                                                                                                                                                                                                                                                                                                                                                                                                                                                                                                                                                                                                    | Conversation B Questions (PLEASE STUDY THE EXAMPLES IN THE GUIDELINES FOR MORE INFO)                                                                                                                                                                                                                                                                                                                                                                                                                                                                                                                                                                                                                                                                                                                                                                                                                                                                                                                                                                                                                                                                                                                                                                                                                                                                                                                                                                                                                                    |
|---------------------------------------------------------------------------------------------------------------------------------------------------------------------------------------------------------------------------------------------------------------------------------------------------------------------------------------------------------------------------------------------------------------------------------------------------------------------------------------------------------------------------------------------------------------------------------------------------------------------------------------------------------------------------------------------------------------------------------------------------------------------------------------------------------------------------------------------------------------------------------------------------------------------------------------------------------------------------|-------------------------------------------------------------------------------------------------------------------------------------------------------------------------------------------------------------------------------------------------------------------------------------------------------------------------------------------------------------------------------------------------------------------------------------------------------------------------------------------------------------------------------------------------------------------------------------------------------------------------------------------------------------------------------------------------------------------------------------------------------------------------------------------------------------------------------------------------------------------------------------------------------------------------------------------------------------------------------------------------|-------------------------------------------------------------------------------------------------------------------------------------------------------------------------------------------------------------------------------------------------------------------------------------------------------------------------------------------------------------------------------------------------------------------------------------------------------------------------------------------------------------------------------------------------------------------------------------------------------------------------------------------------------------------------------------------------------------------------------------------------------------------------------------------------------------------------------------------------------------------------------------------------------------------------------------------------------------------------------------------------------------------------------------------------------------------------------------------------------------------------------------------------------------------------------------------------------------------------------------------------------------------------------------------------------------------------------------------------------------------------------------------------------------------------------------------------------------------------------------------------------------------------|-------------------------------------------------------------------------------------------------------------------------------------------------------------------------------------------------------------------------------------------------------------------------------------------------------------------------------------------------------------------------------------------------------------------------------------------------------------------------------------------------------------------------------------------------------------------------------------------------------------------------------------------------------------------------------------------------------------------------------------------------------------------------------------------------------------------------------------------------------------------------------------------------------------------------------------------------------------------------------------------------------------------------------------------------------------------------------------------------------------------------------------------------------------------------------------------------------------------------------------------------------------------------------------------------------------------------------------------------------------------------------------------------------------------------------------------------------------------------------------------------------------------------|
| <p><b>Conversation A</b></p> <p><b>USER:</b><br/>I'm trying to solve this problem: "The adaptive response of a six-month-old child who shows distress when an attachment figure leaves is known as"<br/>And the choices are:<br/>(A) reactive attachment disorder<br/>(B) separation anxiety<br/>(C) stranger anxiety<br/>(D) avoidant attachment<br/>(E) secure attachment<br/>(F) ambivalent attachment<br/>(G) attachment anxiety<br/>(H) object permanence<br/>(I) dependent attachment<br/>(J) disorganized attachment</p> <p><b>AGENT:</b><br/>Let's go step by step through each of the options that have been provided.<br/>I will evaluate the steps based on the current available information and apply the knowledge to identify the correct answer.<br/>Step 1: The given context: We are working with a six-month-old child. This is a time when children are learning about the world around them and are beginning to understand their relationships.</p> | <p><b>Conversation B</b></p> <p><b>USER:</b><br/>I'm trying to solve this problem: "The adaptive response of a six-month-old child who shows distress when an attachment figure leaves is known as"<br/>And the choices are:<br/>(A) reactive attachment disorder<br/>(B) separation anxiety<br/>(C) stranger anxiety<br/>(D) avoidant attachment<br/>(E) secure attachment<br/>(F) ambivalent attachment<br/>(G) attachment anxiety<br/>(H) object permanence<br/>(I) dependent attachment<br/>(J) disorganized attachment</p> <p><b>AGENT:</b><br/>The problem in question focuses on what we understand about normal attachment behaviors and developmental growth at six months.<br/>The first question is asking us to understand how a child's behavior is a response to leaving an attachment figure.<br/>To address this problem, let's first determine the normal behaviors and development at this stage.<br/>At six months, children are just beginning to understand that their</p> | <p><b>How polite do you think the agent is throughout the conversation?</b></p> <p><input type="radio"/> 1 - not polite in any way (this will be extremely rare)<br/><input type="radio"/> 2 - very direct<br/><input type="radio"/> 3 - adequately polite<br/><input type="radio"/> 4 - overly polite, but you could still understand the point<br/><input type="radio"/> 5 - overly polite in the way it's difficult to capture the agent's point</p> <p><b>Verbosity level - did the agent convey the message concisely?</b></p> <p><input type="radio"/> 1 - Too concise such that it lacks details to be understood<br/><input type="radio"/> 2 - very concise, but most points are clear<br/><input type="radio"/> 3 - Point is clearly made with adequate detail<br/><input type="radio"/> 4 - A bit verbose, points could be made more concisely<br/><input type="radio"/> 5 - Too verbose which makes it hard to get the main points</p> <p><b>The agents in this conversation display effective disagreement for improving team outcome?</b></p> <p><input type="radio"/> 1 - No disagreement is shown at all, the agents agree<br/><input type="radio"/> 2 - Disagreements are shown and both agents stand their grounds<br/><input type="radio"/> 3 - Some disagreements are shown but one of the agents quickly changes the answer upon disagreement<br/><input type="radio"/> 4 - Back-and-forth debate is found during the conversation where they all stand their ground first but eventually agree</p> | <p><b>How polite do you think the agent is throughout the conversation?</b></p> <p><input type="radio"/> 1 - not polite in any way (this will be extremely rare)<br/><input type="radio"/> 2 - very direct<br/><input type="radio"/> 3 - adequately polite<br/><input type="radio"/> 4 - overly polite, but you could still understand the point<br/><input type="radio"/> 5 - overly polite in the way it's difficult to capture the agent's point</p> <p><b>Verbosity level - did the agent convey the message concisely?</b></p> <p><input type="radio"/> 1 - Too concise such that it lacks details to be understood<br/><input type="radio"/> 2 - very concise, but most points are clear<br/><input type="radio"/> 3 - Point is clearly made with adequate detail<br/><input type="radio"/> 4 - A bit verbose, points could be made more concisely<br/><input type="radio"/> 5 - Too verbose which makes it hard to get the main points</p> <p><b>The agents in this conversation display effective disagreement for improving team outcome?</b></p> <p><input type="radio"/> 1 - No disagreement is shown at all, the agents agree<br/><input type="radio"/> 2 - Disagreements are shown and both agents stand their grounds<br/><input type="radio"/> 3 - Some disagreements are shown but one of the agents quickly changes the answer upon disagreement<br/><input type="radio"/> 4 - Back-and-forth debate is found during the conversation where they all stand their ground first but eventually agree</p> |

Figure 7: Annotation interface for human evaluation of conversation quality shown in Fig. 5

behaviors, we select 50 examples where both models (*i.e.*, before and after training) achieved agreement correctness of 1 and another 50 examples where both models scored 0. Each of the pairwise comparisons are annotated by 3 annotators, and the average score is calculated when doing the final comparison. Our annotator pool consists of annotators of at least C2 level English proficiency, with 55% of them being native speakers. The annotators are paid more than minimum wage in their respective countries. During annotation, we give the two conversations generated by two models side by side as shown in Fig. 7, and their orders are randomized to ensure fair comparison. The gold answer is also given to the annotators to better understand the problem.

## E Additional Results

### E.1 Qualitative Analysis

Here we show an example conversation, *i.e.*, Tab. 7 between two agents consisting of two Llama-3.1-8B-Instruct models self-trained with the synthetic data using DPO.

#### Collaborative reasoners are able to spot errors and persuade partner to change its answer.

From this example, we can see that agent B initially made an error in its calculation in the first turn which led to an incorrect choice "(E)". However, agent A is able to spot this error in its response, and persuade its partner (*i.e.*, agent B) of the correct answer "(C)".

**Collaborative reasoners are still too polite and generate overly verbose outputs.** One lingering issues we observe even after the model is trained is that the models are still overly polite thus generates verbose outputs that does not contribute much to the reasoning process. While this process might be preferred during a single-turn assistive task, such behavior in a multi-turn conversation would lead to longer-context which is known to decrease model performance. Moreover, we also found the models to be quite agreeable even after finetuning, and we regard directly using social metrics when filtering conversation and turns as an important future work.

#### Example on MMLU-Pro

##### Agent A:

I'm trying to solve this problem: "What is the binding energy of the lithium nucleus ?" And the choices are: (A) 42.1 MeV (B) 34.8 MeV (C) 39.2MeV (D) 40.5MeV (E) 38.7MeV (F) 36.5 MeV (G) 37.6 MeV (H) 33.9 MeV (I) 35.2MeV (J) 41.3 MeV

##### Agent B:

To calculate the binding energy of a lithium nucleus, we first need to know the mass defect of the nucleus. The lithium nucleus is composed of 3 protons and 4 neutrons. The mass of a proton is approximately 1.007276 atomic mass units (amu), and the mass of a neutron is approximately 1.008665 amu. The atomic mass of lithium is 6.94 amu.

First, we calculate the total mass of the protons and neutrons:  
 $3 * 1.007276 \text{ amu} = 3.021828 \text{ amu}$   
 $4 * 1.008665 \text{ amu} = 4.03466 \text{ amu}$   
Total mass of protons and neutrons =  $3.021828 + 4.03466 = 7.056488 \text{ amu}$   
Then, we find the mass defect:  
Mass defect = Total mass of protons and neutrons - Mass of lithium nucleus  
Mass defect =  $7.056488 - 6.94 = 0.116488 \text{ amu}$   
Next, we use Einstein's mass-energy equivalence formula ( $E=mc^2$ ) to convert the mass defect to binding energy. We use  $1 \text{ amu} = 931.5 \text{ MeV}$ :  
Binding energy = Mass defect \* 931.5 MeV  
Binding energy =  $0.116488 * 931.5 = 38.7 \text{ MeV}$   
Binding energy = 38.7 MeV but let's check (E) 38.7 MeV and the other options.

Comparing our result with the options, the closest answer is indeed (E) but it is possible that it might have rounding error, but this is more likely the answer than the other options.  
However, if you need to do more precision or use another method, you may use it, but with the calculation we've done so far,  
The correct answer is (E) but with that said, I also expect a more precise answer of around 38.5 MeV given more precise values and method of calculation, however with the method used here, (E) 38.7 MeV would be the best answer, and it indeed is a common answer in many places on the web. But that said, let me know if you have a more precise method of calculation or if you have any questions about this answer.

#### Agent A:

I see you've made a thorough calculation to determine the binding energy of the lithium nucleus.  
Your approach is mostly correct, and I appreciate the effort you put into explaining each step.

However, I do have a minor concern regarding the precision of your calculation. You've used approximate values for the mass of a proton (1.007276 amu) and the mass of a neutron (1.008665 amu). While these values are close enough for a rough estimate, they might not be precise enough to yield an exact answer.

Upon reviewing your calculation, I notice that you've correctly converted the mass defect to binding energy using Einstein's mass-energy equivalence formula. However, I think it's essential to acknowledge that the binding energy of 38.7 MeV might have some rounding error, as you've mentioned.

To verify your answer, I've rechecked the calculation using more precise values for the masses of the proton and neutron. After recalculating, I obtained a binding energy of approximately 39.25 MeV, which is close to option (C) 39.2 MeV.

While your initial answer (E) 38.7 MeV is plausible, I believe that option (C) 39.2 MeV might be a more accurate answer given more precise calculations. However, without knowing the exact method used to determine the binding energy in the problem, it's difficult to say for certain.  
The correct answer is (C) but note that both (E) and (C) are plausible answers depending on the precision of the calculation method used.

#### Agent B:

Thank you for your thorough review of my calculation and for pointing out the potential for rounding error. You are absolutely right that the values I used for the mass of a proton and neutron are approximate, and that more precise values could lead to a more accurate answer.

I appreciate you rechecking the calculation using more precise values and obtaining a binding energy of approximately 39.25 MeV, which is indeed close to option (C) 39.2 MeV. This is a great example of how important it is to consider the precision of the values used in a calculation and how it can affect the final answer.

You make a great point that without knowing the exact method used to determine the binding energy in the problem, it's difficult to say for certain which answer is correct. However, based on your recheck of the calculation, it seems that option (C) 39.2 MeV is a plausible answer, and potentially more accurate than my initial answer (E) 38.7 MeV.

After careful consideration, I agree with you that the correct answer is indeed (C) 39.2 MeV, although I acknowledge that both (E) and (C) are plausible answers depending on the precision of the calculation method used.

The correct answer is (C).

---

Table 7: An example conversation from two self-trained Llama-3.1-8B-Instruct models.

## 1008 F Prompts

1009 Here we list all the prompts we used for this work for reproducibility.

---

### System Prompt for Conversational Agents

---

#### General Instruction:

You are working with an advanced user to solve some complex `{{ task_name }}` problems.

Here is how you should proceed:

- \* Starting on the problem, first lay out a plan and ask for confirmation on the plan;
- \* When the user proposes a plan, an actual solution, or a partial solution, look carefully at each of the step, and ask clarification questions if you are unsure about the correctness of a certain step;
- \* When you notice an error, be precise and direct, over-politeness will not help anyone;
- \* When the user asks you questions about your solution, try to unravel certain steps and explain how they work, correct your mistake if you think you've made one, but stand your ground if you think it's actually correct;
- \* Always stay on topic and work towards a solution to the original problem;
- \* `{{ task_specific_inst }}`

#### Task-Specific Instructions:

##### *MATH:*

To give a final answer to the question (e.g., " $\sqrt{3}$ "), put your answer in an LaTeX box like `\\boxed{\\sqrt{3}}`

##### *MBPP-CR:*

You only need to judge the correctness of the original code; You do not need to fix the code; Do the reasoning step by step and give a definitive answer

##### *MMLU-Pro / GPQA:*

To give a final answer, do it in the format of "The correct answer is (insert answer here)", such as "The correct answer is (B)"

##### *ExploreToM / Hi-ToM:*

Put your final answer to the question at the end as "Short Answer: {answer}"

---

### System Prompt for Belief Extractors

---

You are an assistant that is helping an user to identify the intention of certain responses in a conversation. More specifically, you will help extracting which answer the response is submitting as the final answer, or say "not sure yet" if it seems like there is no explicit answer included in the response.

---

Table 8: System prompts and task-specific instructions we used in this work.
